# Supplementary material for: Laboratory cryo x-ray microscopy for 3D cell imaging
Source: PubMed Central journal article supplement (PMC5647409; doi:10.1038/s41598-017-13538-2), 2017-10-18
Supplement: 41598_2017_13538_MOESM1_ESM.pdf [file 41598_2017_13538_MOESM1_ESM.pdf]

# Supplementary Material

## Laboratory x-ray cryo microscopy for 3D cell imaging.

Emelie Fogelqvist<sup>1</sup>, Mikael Kördel<sup>1</sup>, Valentina Carannante<sup>2</sup>, Björn Önfelt<sup>1,2</sup>, and Hans M. Hertz<sup>1\*</sup>

<sup>1</sup> Department of Applied Physics, KTH Royal Institute of Technology/Albanova, 106 91 Stockholm, Sweden

<sup>2</sup> Department of Microbiology, Tumor and Cell Biology, Karolinska Institutet, 171 77 Solna, Sweden

\*Correspondence: [hertz@biox.kth.se](mailto:hertz@biox.kth.se)

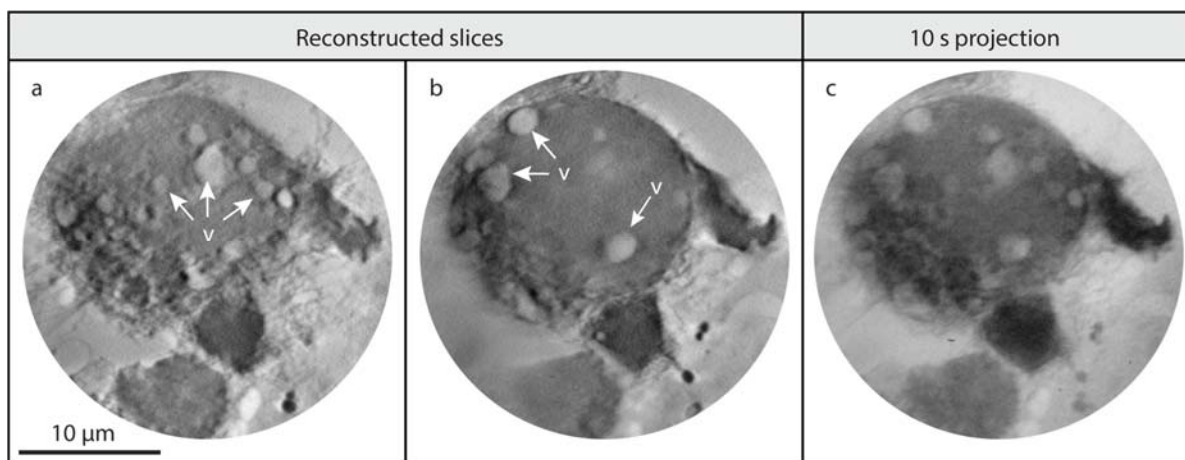

**Figure S1. 3D tomographic reconstruction of NK cell interaction with HEK293T cell.** This figure shows a similar interaction as in Fig. 5 but later in the killing process with vacuole formation. **(a-b)** Two slices from the reconstructed 3D volume of two NK cells interacting with a starved HEK293T cell. Vacuoles (v) are marked in the images. The full volume stack is provided in Supplementary material. **(c)** One of the 2D 10-second projections used for the tomography, for comparison. Scale bar 10  $\mu\text{m}$ .

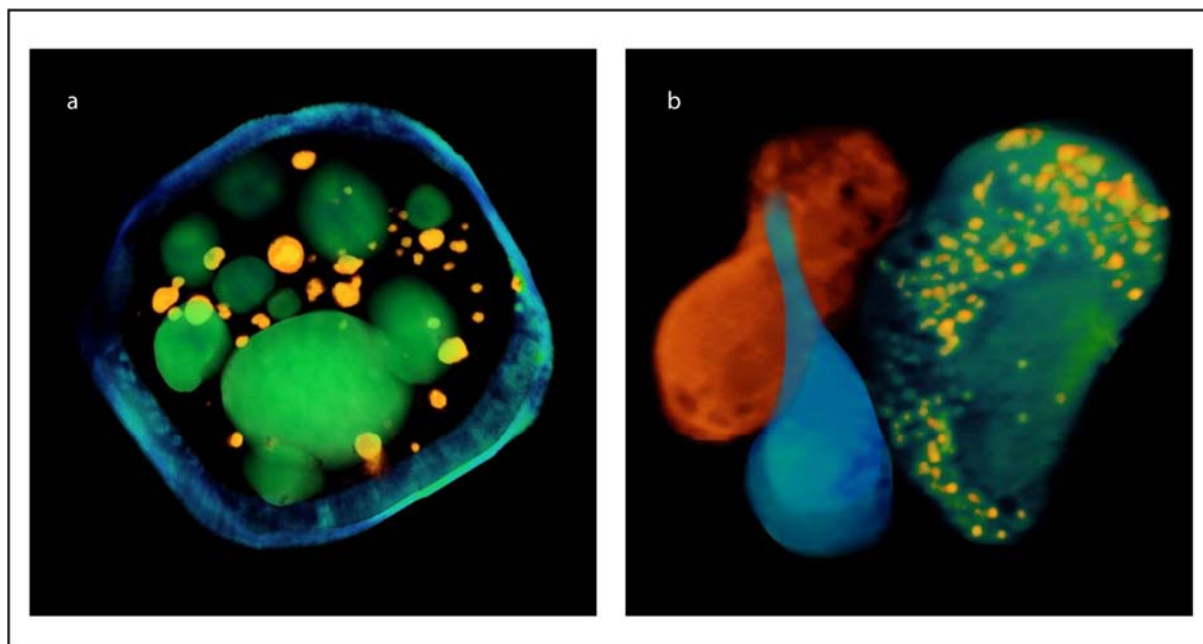

**Figure S2. Volume segmentations. (a-b)** The figure shows preliminary segmentations of the reconstructed volumes presented in Fig. 3 (Video S3) and Fig. 5 (Video S4). **(a)** depicts a segmentation of a starving HEK 293T cell showing carbon-dense vesicles (orange) vacuoles (green) and cell membrane (blue). **(b)** shows two NK cells (blue, orange) that are in close contact with a starving HEK293T cell containing carbon-dense vesicles (orange).

**Video S3. Full 3D x-ray volume stack of Fig. 3, a starving HEK 293T cell.** Each voxel corresponds to 35 nm cubed in the sample plane.

**Video S4. Full 3D x-ray volume stack of Fig. 5, NK cell interaction with starving HEK 293T cell.** Each voxel corresponds to 35 nm cubed in the sample plane.

**Video S5. Full 3D x-ray volume stack of Fig. S1 NK cell interaction with HEK293T cell.** Each voxel corresponds to 35 nm cubed in the sample plane.
